# Supplementary material
Source: PubMed Central journal article supplement (PMC5368592)
Supplement: mmc1.pdf [file mmc1.pdf]

YMTHE, Volume 25

## **Supplemental Information**

### **hucMSC Exosome-Derived GPX1 Is Required for the Recovery of Hepatic Oxidant Injury**

**Yongmin Yan, Wenqian Jiang, Youwen Tan, Shengqiang Zou, Hongguang Zhang, Fei Mao, Aihua Gong, Hui Qian, and Wenrong Xu**

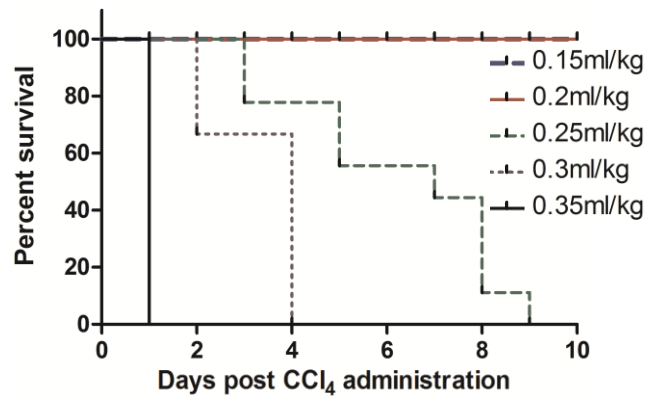

**Fig.S1.** Survival curves of CCl<sub>4</sub> injured mice received dosages between 0.15 and 0.35 mL/kg body wt by intraperitoneal injection.

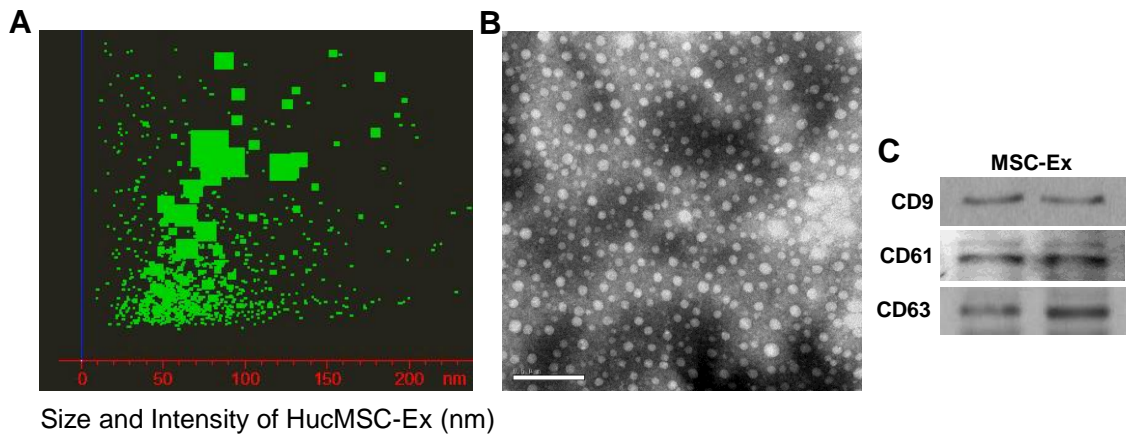

**Fig.S2.** HucMSC-Ex are detected by Nanoparticle Tracking Analysis (NTA) (A) and images under TEM are spheroid (scale bar 500 nm) (B). Western blot of CD9, CD61 and CD63 positive expression in hucMSC-Ex (C).

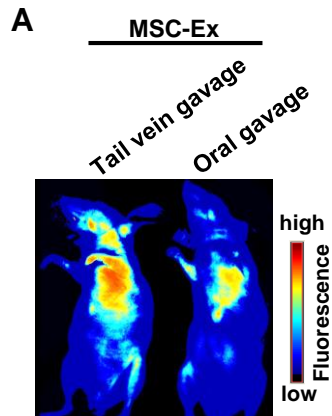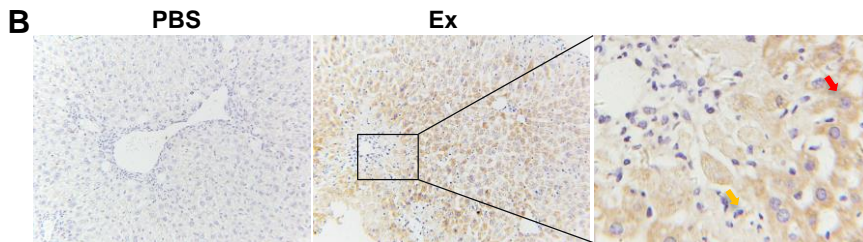

**Fig.S3.** Distribution of CM-Dir labeled hucMSC-Ex in normal mice after tail vein or oral gavage administration (A). Results showed that CM-Dir-labeled hucMSC-Ex administered by tail vein or oral gavage could target normal livers at 24 h post injection. CD63 staining of hucMSC-Ex in CCl<sub>4</sub> injured mouse liver; in each group 48 h after treatment (n = 3; \*, P < 0.05; \*\*, P < 0.01; \*\*\*, P < 0.001). (Red arrow: hepatocyte; Yellow arrow: Kupffer cells). Original magnification 200x (B).

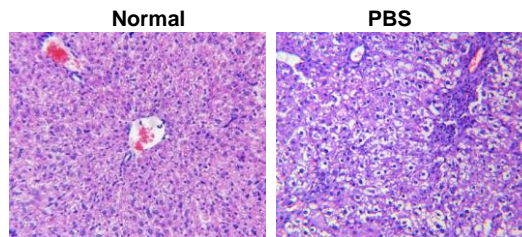

**Fig.S4.** Representative H&E images of mouse livers 72 h after PBS treatment. Original magnification 200x. Large areas of fatty degeneration and portal hepatocyte necrosis were induced in PBS treated mice.

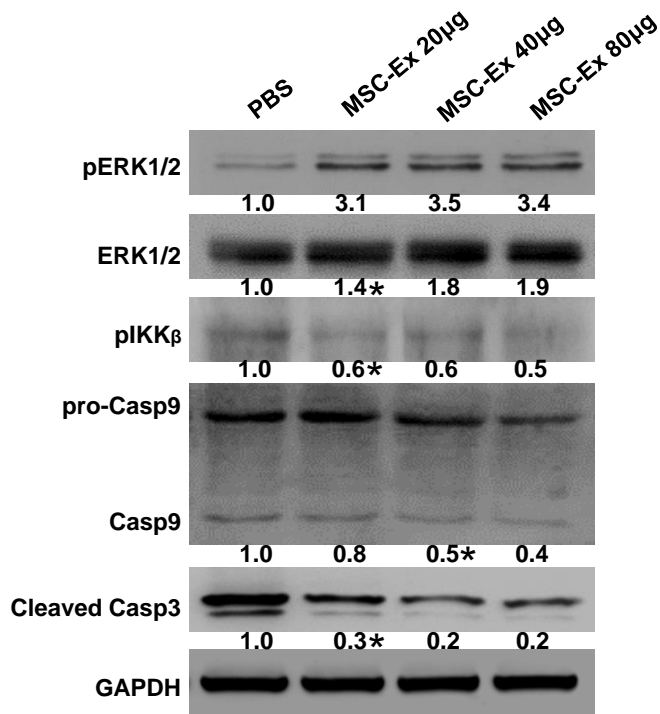

**Fig.S5.** Western blot quantification of pERK1/2, total ERK1/2, pIKKβ, casp9 and cleaved casp3 in CCl<sub>4</sub>-injured L02 cells treated with PBS and hucMSC-Ex. The quantitated data expressed as relative ratio of specific proteins to GAPDH shown as numbers under individual blots (n = 3; \*, P < 0.05).

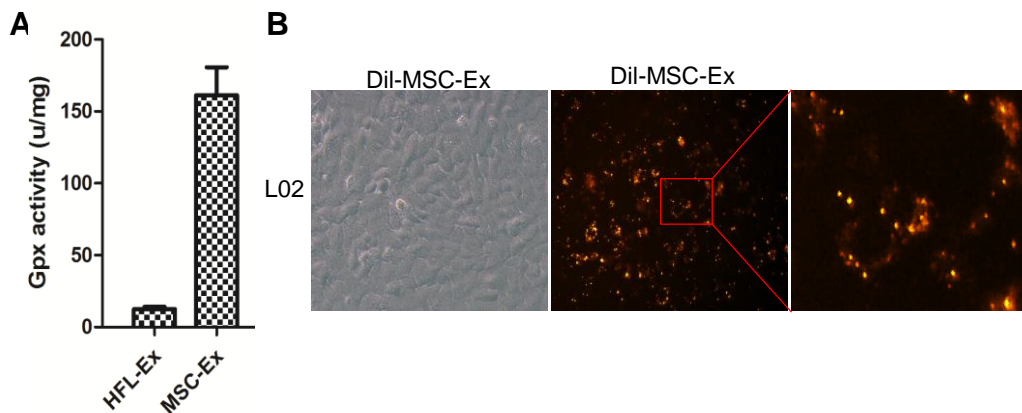

**Fig.S6.** Gpx activity of HFL-Ex and MSC-Ex. (n = 3) (A). Representative image of Dil labeled exosomes in L02 cells. Original magnification 200x. (B)

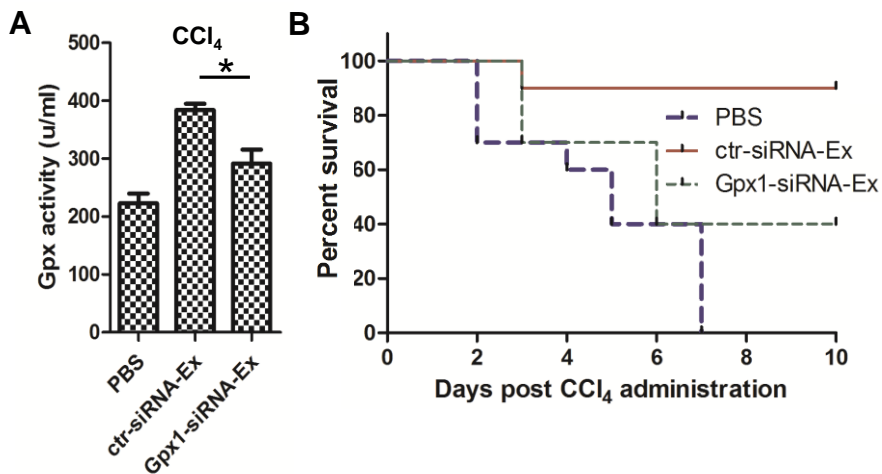

**Fig.S7.** Gpx activity of mice livers measured 48 h after PBS, ctr-siRNA-Ex or Gpx1-siRNA-Ex treatment. (n = 3; \*,  $P < 0.05$ ) (A). Survival curves of CCl<sub>4</sub> injured mice that underwent PBS, ctr-siRNA-Ex and Gpx1-siRNA-Ex administration by tail vein at 32mg/kg body weight (bt). (ctr-siRNA-Ex vs Gpx1-siRNA-Ex, n = 10,  $P < 0.01$ ) (B). Gpx1 knockdown reduced Gpx activity in ex vivo hepatocytes (n = 3; \*,  $P < 0.05$ ) and attenuated the rescue of hucMSC-Ex on CCl<sub>4</sub> induced liver failure (n = 10; \*,  $P < 0.05$ ).
